# Supplementary material
Source: publisher figshare collection journal article supplement (https://sage.figshare.com/ndownloader/files/14375702)
Supplement: Supplementary file [file 14375702]

# Supplemental 1

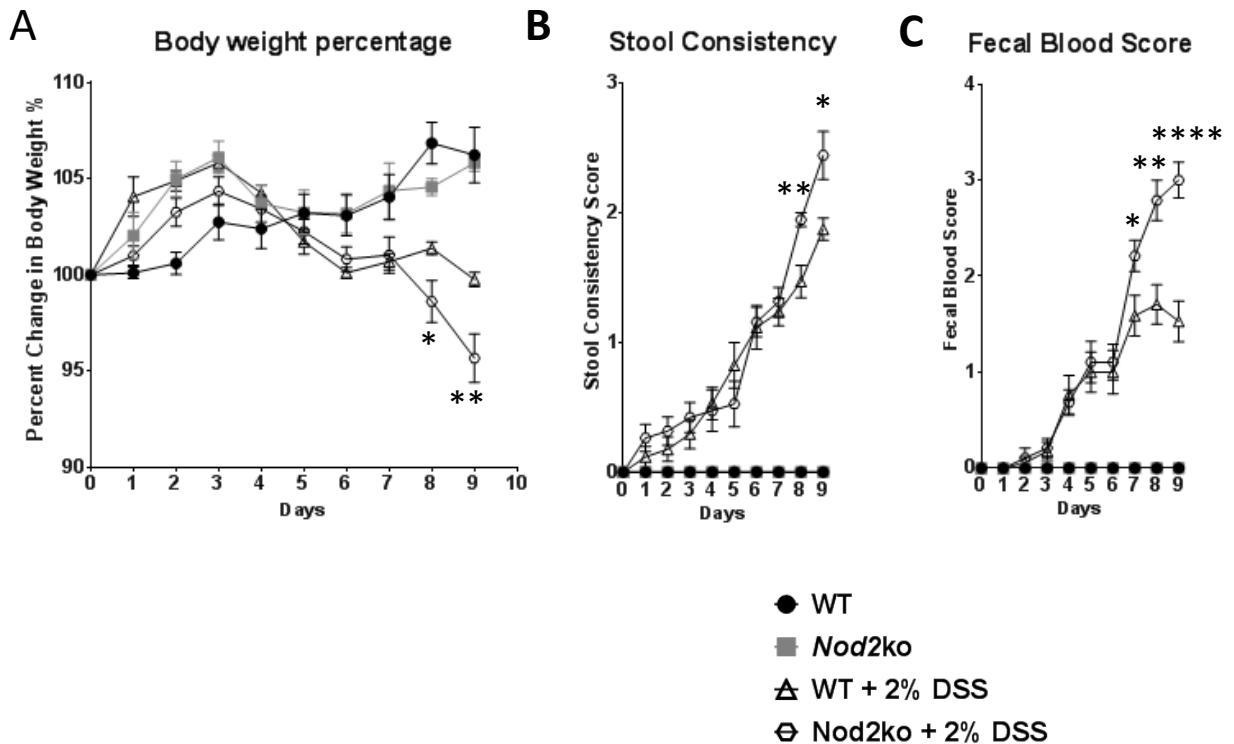

**A.** Daily percentage of body mass loss or gain compared to body mass on d 0 of the study. **B., C.** Stool consistency and occult fecal blood in the stool scored daily.

# Supplemental Figure 2

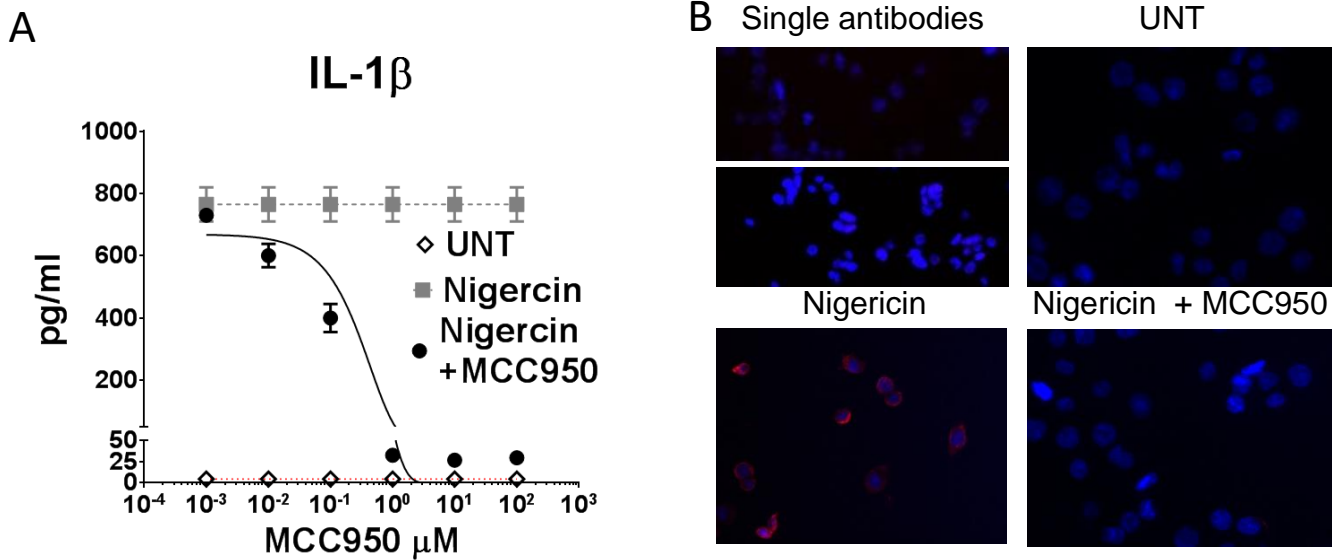

**A.** Release of IL-1 $\beta$  from PMA differentiated THP-1 cells after 24 h of treatment with nigericin and MCC950. **B.** Detection of NLRP3 inflammasome formation by Duolink proximity ligation assay, this assay stains ASC and NLRP3 in PMA differentiated THP1 cells. Blue is DAPI and red detects proximately of ASC and NLRP3 when in close proximity. Single Ab controls were treated with either anti-NLRP3 (top panel) or anti-ASC (bottom panel) primary Ab alone, and then using the same protocol of secondary Ab. THP-1 cells were treated with NLRP3 agonist nigericin at 5  $\mu$ g/ml for 24 h with or without the presence of 1  $\mu$ M MCC950.

# Supplemental 3

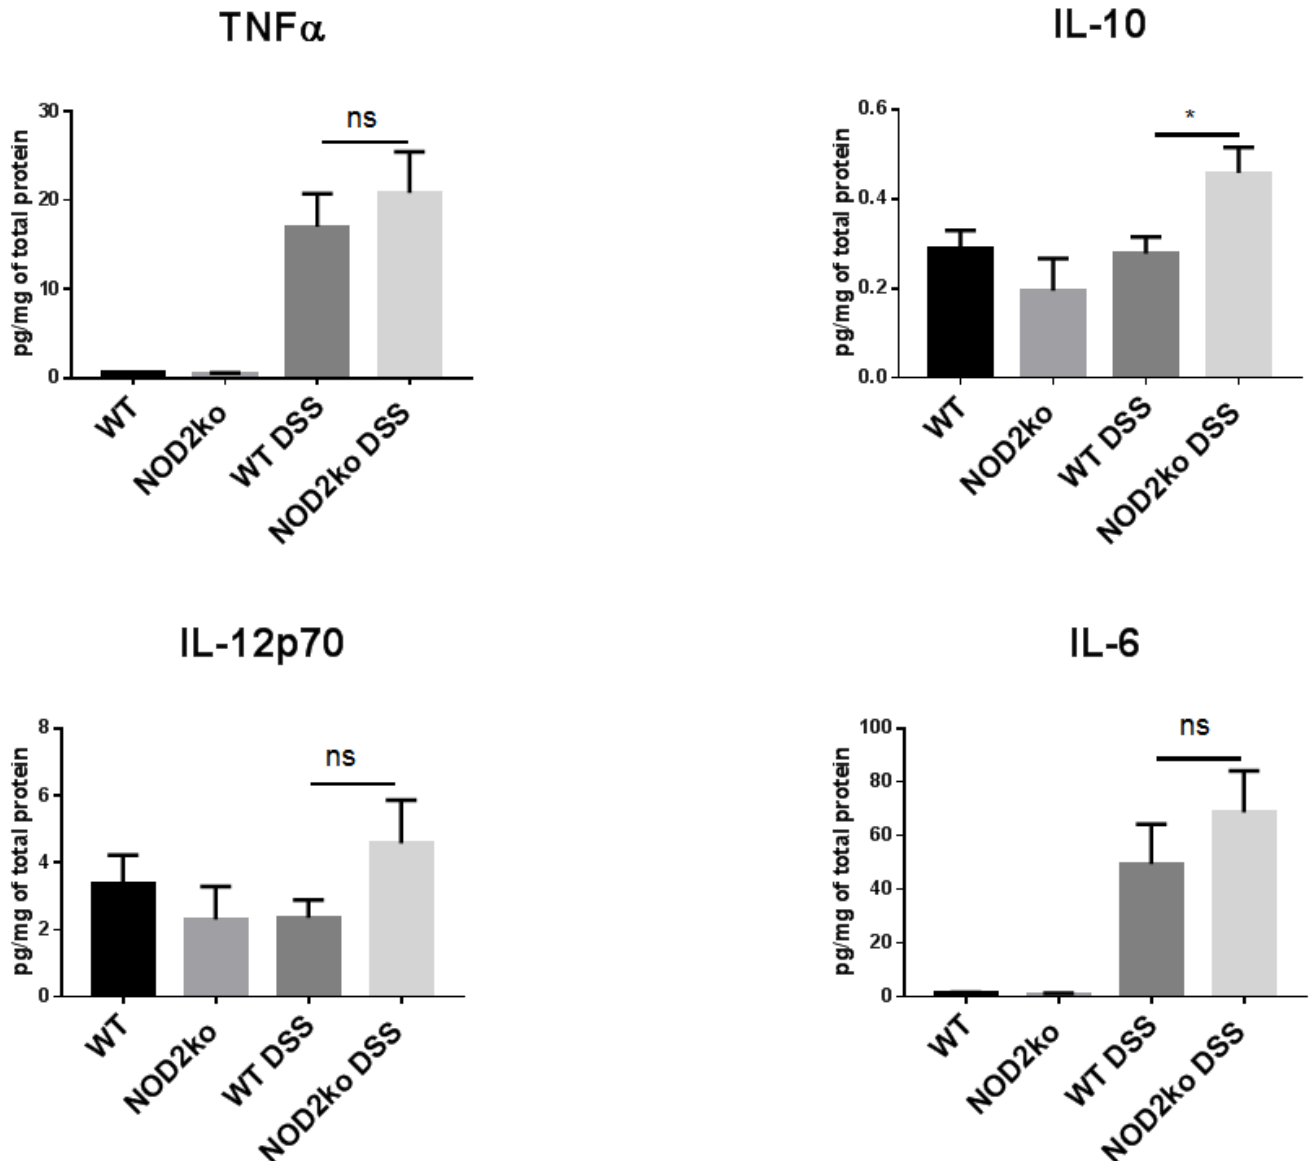

Concentrations of TNF- $\alpha$ , IL-10, IL-12p70 and IL-6 in colon homogenates divided by the total protein concentration of the colon homogenates from at least 8 mice per group.

# Supplemental 4

IL-1 $\beta$

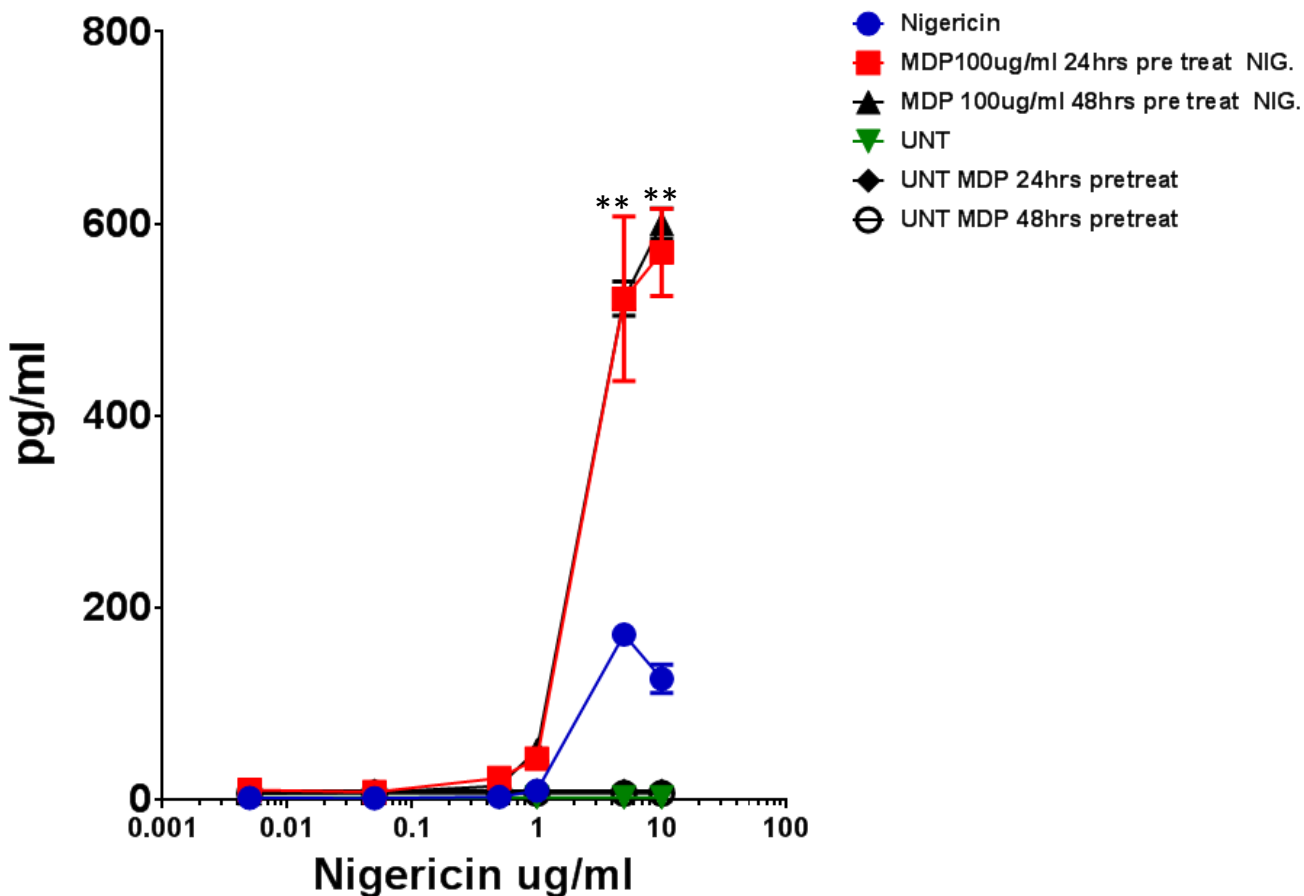

IL-1 $\beta$  concentrations from supernatants of PMA differentiated THP-1 cells. Cells were pretreated for 24 and 48 h with MDP at 100  $\mu$ g/ml, followed by treatment with nigericin at the doses indicated.

# Supplemental Figure 5

## IL-8

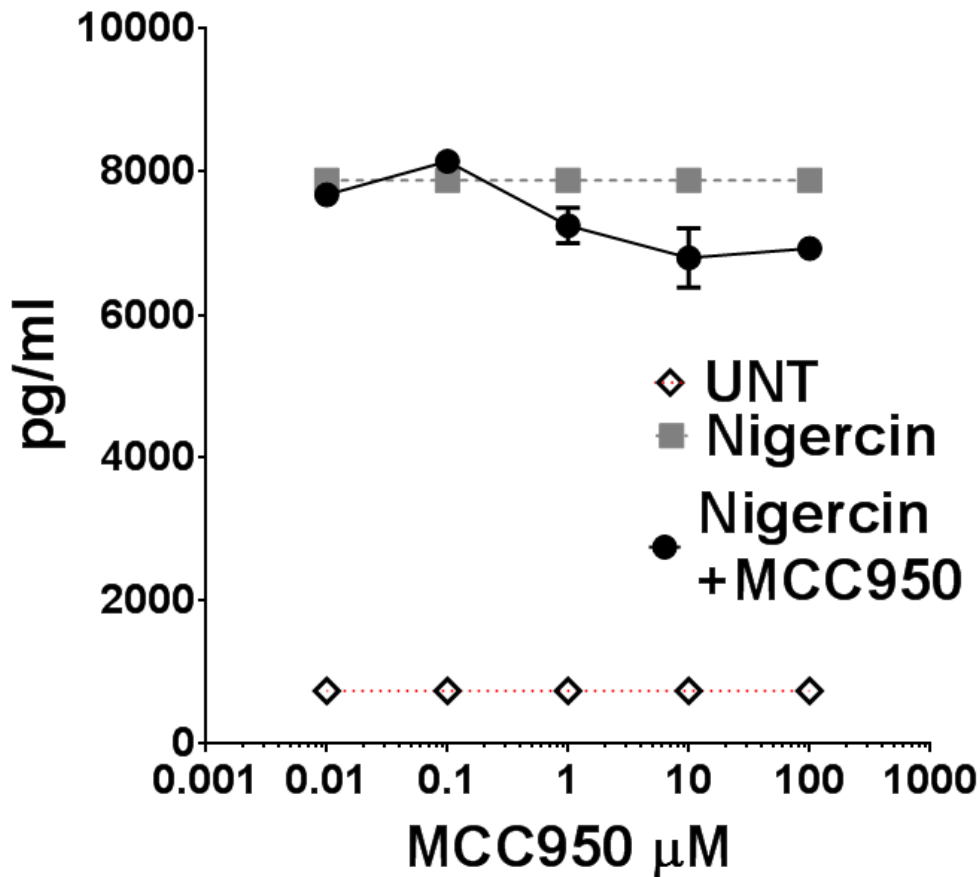

IL-8 from PMA differentiated THP-1 cells. Cells were treated with nigericin at 5  $\mu$ g/ml and a concentration gradient of MCC950.

# Supplemental Figure 6

## Serum Cytokine Levels

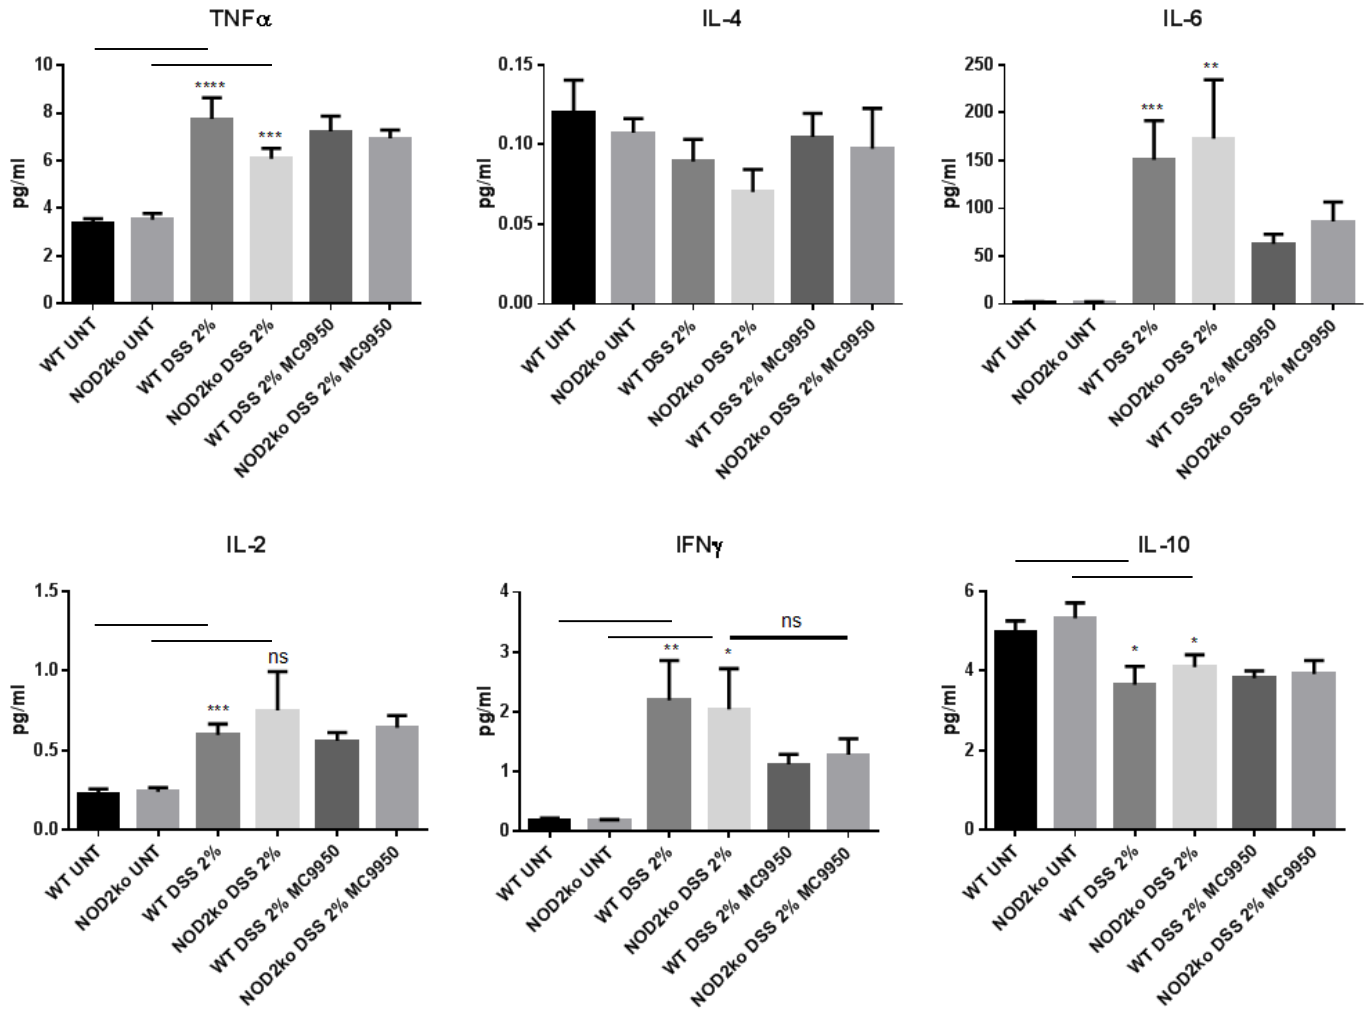

Concentrations of cytokines in the sera after 9 d of 2% DSS exposure.

# Supplemental Figure 7

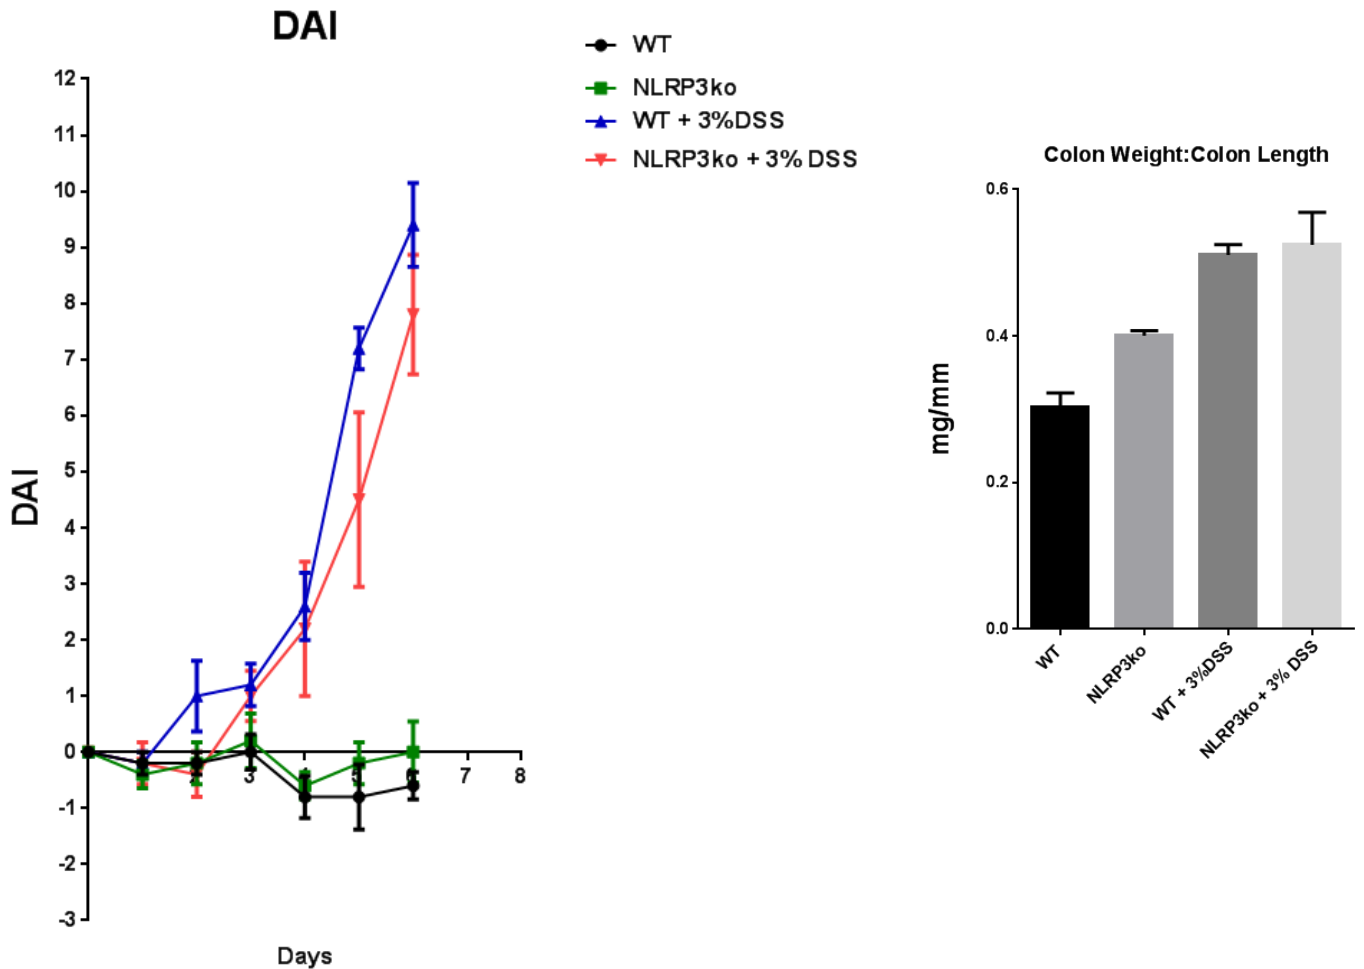

DSS at 3% in *Nlrp3* knockout mice. Disease Activity Index, scored by the addition of Stool consistency score, occult fecal blood score and body mass score. Colon masses (mg) divided by the length of colon (mm) on d 9 of DSS treatment.

# Supplemental 8

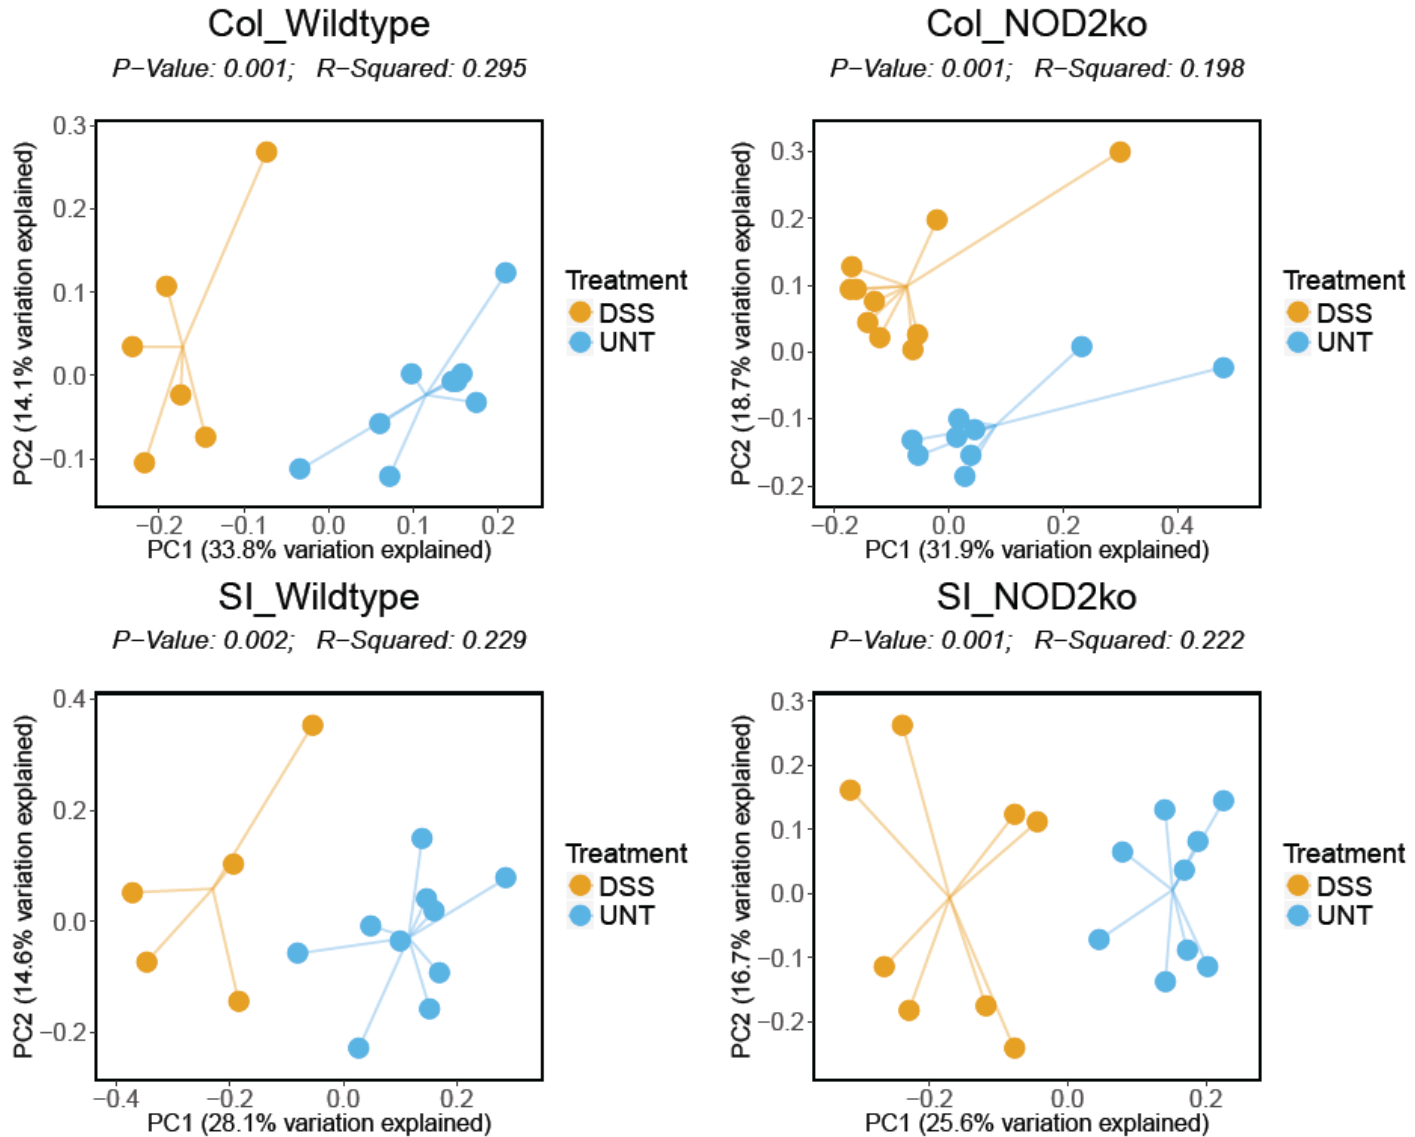

PcOA analysis using a un-weighted UniFrac of small intestinal and colonic bacteria in wild type and *Nod2*<sup>-/-</sup> mice comparing un-treated and 2% DSS treated mice.



# Supplemental Figure 9

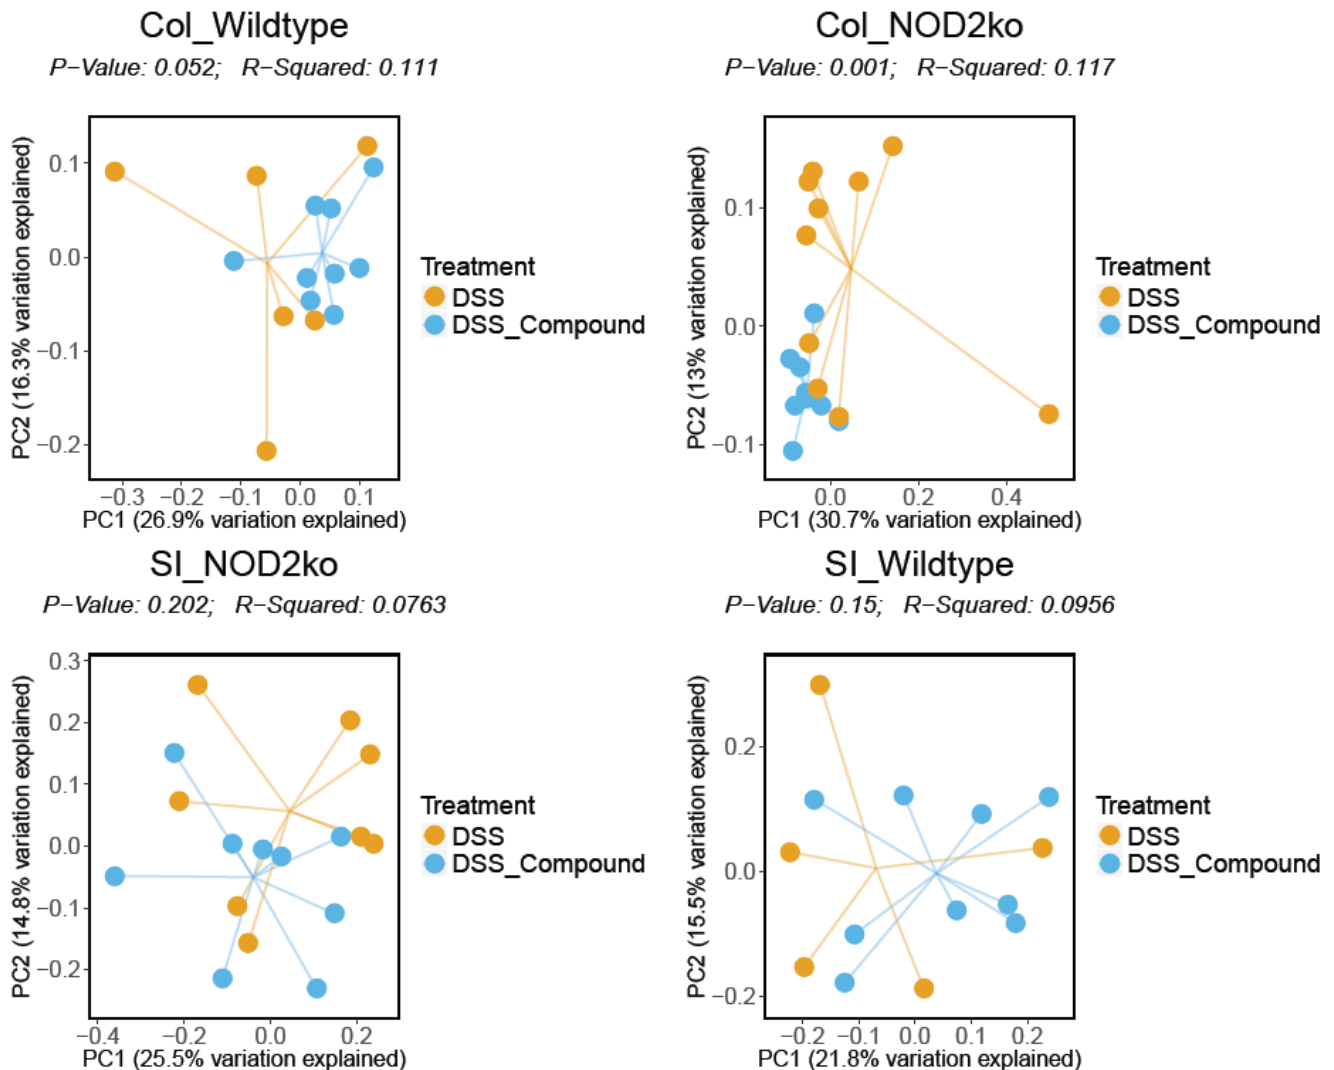

PcOA analysis using a un-weighted UniFrac of small intestinal and colonic bacteria in wild type and *Nod2*<sup>-/-</sup> mice comparing 2% DSS-treated mice and 2% DSS and MCC950-treated mice.

# Supplemental Figure 10

Day2

*P*-Value: 0.539; *R*-Squared: 0.0295

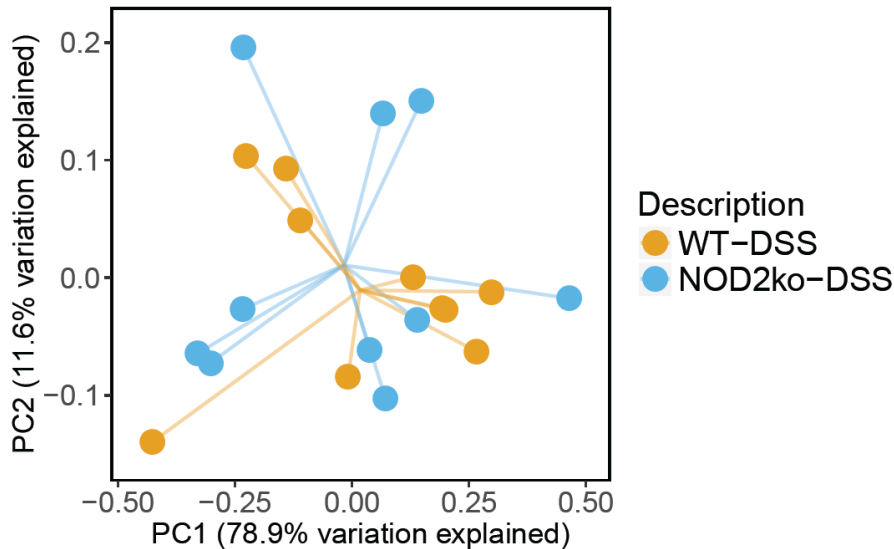

Day7

*P*-Value: 0.353; *R*-Squared: 0.05

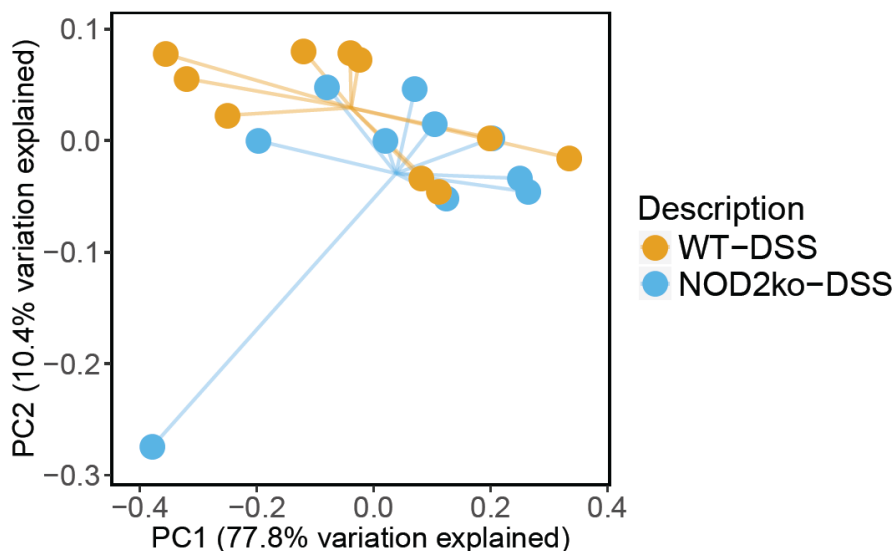

PcOA analysis using a un-weighted UniFrac in the feces in wild type and *Nod2*<sup>-/-</sup> mice treated with 2% DSS at d 2 and d 7 of DSS exposure.

# Supplemental Figure 11

## Up-regulated

|         |
|---------|
| Tyk2    |
| Tlr2    |
| Ltb4r1  |
| Ddx58   |
| Tlr8    |
| Il1rl2  |
| Itgal   |
| Mapk14  |
| Irak3   |
| Marco   |
| Btk     |
| Clec5a  |
| Ppbp    |
| Tnfsf10 |
| Il12a   |
| Ptpn6   |
| Il13    |
| Cd22    |
| Tlr3    |
| Fkbp5   |
| Il18    |
| Adal    |
| Cd28    |
| Il21r   |
| Pdcd2   |
| Ikzf1   |
| Abcb10  |
| Ifitm1  |
| Itga2b  |
| Il33    |
| Cradd   |

## Down-regulated

|          |           |          |         |
|----------|-----------|----------|---------|
| Fcgr4    | Cd83      | Il7r     | C1qb    |
| Cxcl1    | Cxcl9     | Tnfaip3  | Cd14    |
| Mx1      | Fcgr1     | Il6st    | Ptafr   |
| Mbp      | Cfb       | Ccl7     | B2m     |
| Cd82     | H2-DMa    | Stat5a   | Pla2g2e |
| Tnfaip6  | Hamp      | Clu      | Gpr183  |
| Cd27     | Cish      | Il10     | Mapk11  |
| Vcam1    | Cd80      | Il15ra   | Ccl22   |
| Ccl2     | Cxcr1     | Mapkapk2 | Ccl4    |
| Slamf1   | Ifi204    | Nfkbiz   | Bcl6    |
| Ccl3     | Csf1r     | Pdgfb    | Icosl   |
| Il10ra   | Ets1      | Il15     | Btla    |
| Icam2    | Stat4     | Il1r1    | Plau    |
| Ccr12    | Tnfrsf8   | Il1rap   | Icam1   |
| Ccl5     | Nfkbia    | H2-Aa    | Tollip  |
| Il1rn    | Il27      | Socs1    | Csf2    |
| Irf7     | Il23a     | Irf4     | Notch1  |
| Ifi35    | Cd99      | Cd74     | Tnfrsf4 |
| Ptgs2    | Ccl12     | H2-DMb2  |         |
| Tnfrsf9  | Nfil3     | Nfatc1   | Ptger4  |
| Tap1     | Tnfrsf13b | Cd44     | Fn1     |
| Fcgr3    | Entpd1    | Cd109    |         |
| Il6      | Cd86      | Pou2f2   |         |
| Lta      | H2-K1     | Phlpp1   |         |
| Ctsc     | Ifngr2    | Nod2     |         |
| Ly86     | Abcb1a    | Pdcd1lg2 |         |
| Tnfrsf1b | Cd69      | Cxcr4    |         |
| Socs3    | Lif       | Cxcl10   |         |
| Tgfb1    | Ptpn2     | Ccl8     |         |
| Tlr9     | Stat3     | Smad3    |         |
| Plaur    | H2-Eb1    | Tnfsf15  |         |
| Cd274    | Traf6     | Fas      |         |
| Casp3    | Litaf     | Bcl3     |         |
| Bst2     | Irak2     | Cdh5     |         |
| Irf1     | Cd40      | Il2ra    |         |
| Traf1    | Irf8      | Ccr5     |         |
| Ctss     | Il4ra     | Map4k4   |         |
| Cdkn1a   | Hif1a     | H2-Q10   |         |
| Slamf7   | Cebpb     | Tagap    |         |
| Tnf      | Ccr7      | C1qa     |         |

List of genes that are significantly higher and lower in *Nod2*<sup>-/-</sup> BMDM after treatment with LPS and nigericin compared with wild type BMDMs as found in a Nanostring mouse immunology panel.
